# Supplementary material
Source: Springer Nature journal article supplement (https://www.springermedizin.de/resource/supplementary/12993_2011_341_MOESM3_ESM.pdf/9617566)

# Body Weights

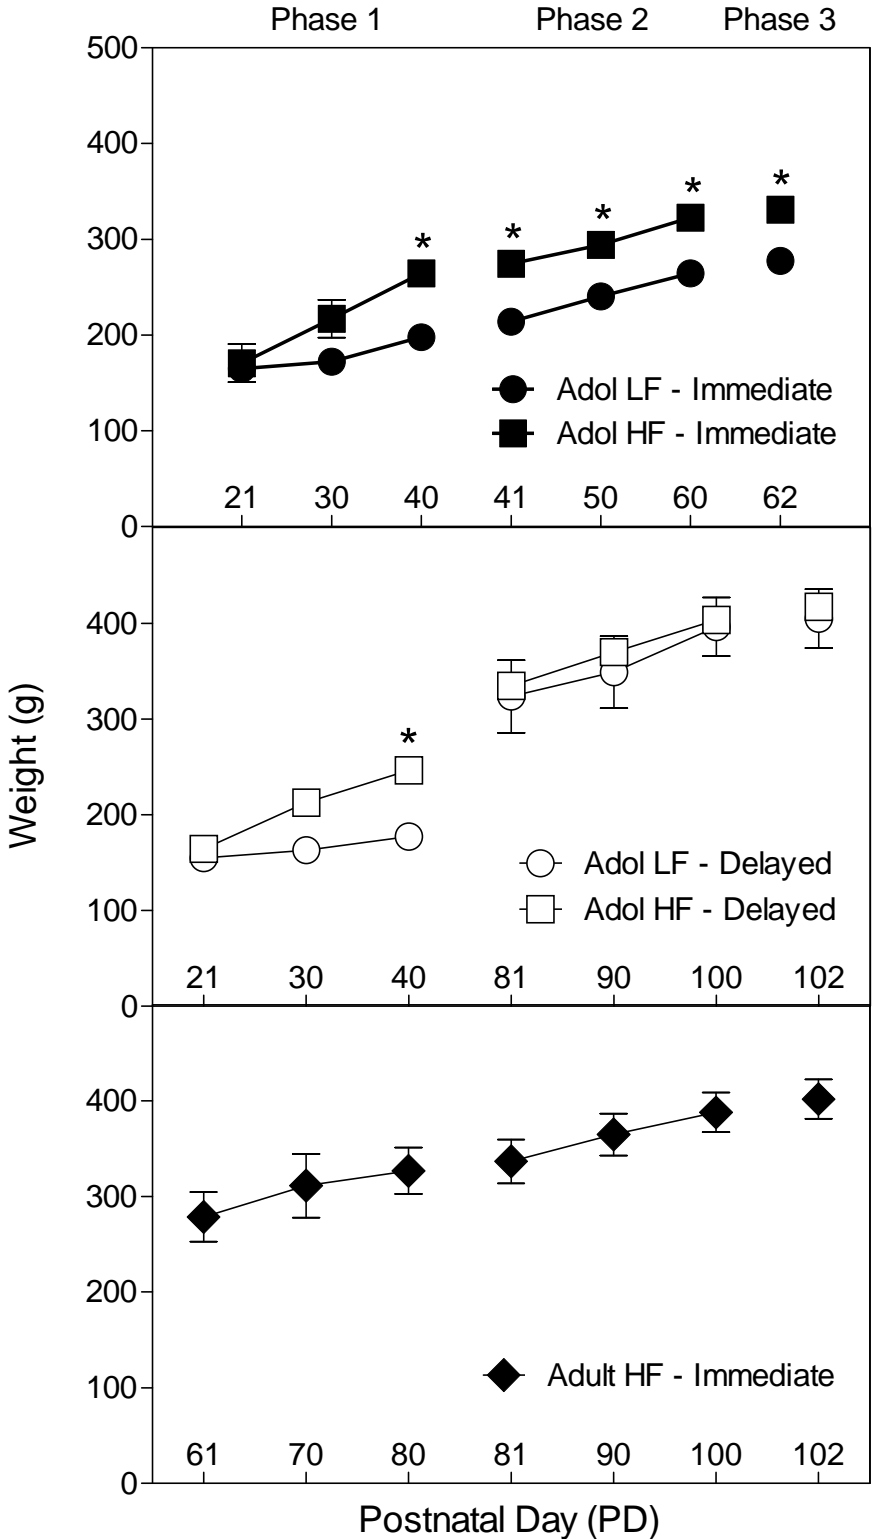

Supplement: MOESM3 [file 9617566]
